# Supplementary material for: Influence of a hyperlipidic diet on the composition of the non-membrane lipid pool of red blood cells of male and female rats
Source: PeerJ. 2015 Jul 14;3:e1083. doi: 10.7717/peerj.1083 (PMC4512764; doi:10.7717/peerj.1083)
Supplement: Supplemental Information 2 — EXPERIMENTAL DATA UNFORMATTED: NOT A SUPPLEMENTAL FILE. [file peerj-03-1083-s002.xlsx]

## Sheet: Hoja1
						Machos control							plasma
PATRÓN	PM	Área	ppm	ppm/área		Área							concentración (µM)													%
						1	2	3	4	5	6		1	2	3	4	5	6	n	media	error					1	2	3	4	5	6	n	media	error			1	2	3	4	5	6	n	media	error
C14	228	16836610	44.16	2.62286e-06		845024	2268012	630521	2010713	632083	681520		29.1628	78.272	21.7601	69.3922	21.814	23.5201	6	40.6535	10.6122					0.683433	1.33619	0.628352	1.72513	0.509331	0.915168	6	0.966267	0.193071
C15	242	8178707	22.08	2.69969e-06			869846	243381	578860	369216	602477		0	29.1114	8.1453	19.3729	12.3567	20.1633	6	14.8582	4.17838					0	0.496963	0.235207	0.48162	0.288514	0.784552	6	0.381143	0.109757		= en mufa	703.037	1262.04	677.455	883.718	655.954	368.38	6	758.431	121.325
C16	256	25940014	66.24	2.55358e-06		35436323	51821916	26175436	50921387	31497562	17145913		1060.43	1550.76	783.295	1523.81	942.559	513.088	6	1062.32	167.87					24.8511	26.4732	22.6187	37.8828	22.0076	19.9643	6	25.633	2.61877		=en pufa	5809.38	6458.41	4321.9	3515.49	6617.76	3652.9	6	5062.64	573.118
C16:1	254	8522738	22.08	2.59072e-06		4766206	10384516	1504963	4749433	3466101	1814568		145.841	317.756	46.0504	145.328	106.059	55.524	6	136.093	40.2835					3.4178	5.42444	1.32977	3.61293	2.47636	2.16044	6	3.07029	0.582158		=en pufa (n3)	111.336	154.467	72.6505	40.719	116.407	171.579	6	111.193	19.9986
C17	270	8853268	22.08	2.49399e-06		482487	718822	276607	637196	350922	882053		13.3702	19.9193	7.66507	17.6574	9.72442	24.4426	6	15.4632	2.60401					0.313332	0.340044	0.221339	0.438972	0.227054	0.951062	6	0.415301	0.112059		=en pufa (N6)	5698.04	6303.94	4249.25	3474.77	6501.35	3481.32	6	4951.44	566.386
C18	284	17150681	44.16	2.57482e-06		12921664	11346735	13050321	13631512	15745789	8906722		351.454	308.618	354.954	370.762	428.267	242.253	6	342.718	25.5521					8.23636	5.26845	10.2498	9.21734	9.99955	9.42605	6	8.73292	0.749876		=en trans	0	6.40263	0	9.04219	0	42.0497	6	9.58242	6.68331
C18:1	282	17246446	44.16	2.56053e-06		20239164	34201173	22487507	26906709	19962984	10267549		551.308	931.628	612.552	732.929	543.785	279.684	6	608.648	88.5982					12.9199	15.9039	17.6883	18.221	12.6967	10.8825	6	14.7187	1.21833		=total	6512.41	7726.85	4999.35	4408.25	7273.71	4063.33	6	5830.65	631.943
C18:1t	282	8647289	22.08	2.5534e-06			235704		332876		533882		0	6.40263	0	9.04219	0	14.5023	6	4.99118	2.47386					0	0.1093	0	0.224794	0	0.564284	6	0.14973	0.090624		% =en trans	0	0.082862	0	0.20512	0	1.03486	6	0.220474	0.166155
C18:2	280	7871370	22.08	2.8051e-06		40621252	60060608	24821601	15692722	33953669	17728788		1220.86	1805.1	746.005	471.64	1020.47	532.833	6	966.151	204.323					28.6109	30.815	21.5419	11.7252	23.8267	20.7325	6	22.8754	2.754		% =en PUFA	89.2047	83.5839	86.4491	79.748	90.9818	89.8992	6	86.6445	1.76
C18:2t	280	8073975	22.08	2.73471e-06							470085		0	0	0	0	0	13.7737	6	2.29562	2.29562					0	0	0	0	0	0.535935	6	0.0893226	0.0893226		% =en PUFA (n3)	1.7096	1.99909	1.4532	0.923701	1.60038	4.22261	6	1.98476	0.470463
C18:3 n3	278	7409069	22.08	2.98013e-06		401371	561166	198774		402633	668538		12.908	18.0469	6.39251	0	12.9486	21.5	6	11.966	3.18316					0.302499	0.308081	0.184592	0	0.302334	0.836564	6	0.322345	0.113769		% =en PUFA (n6)	87.4951	81.5848	84.9959	78.8243	89.3815	85.6766	6	84.6597	1.58102
C18:3 n6	278	7067056	22.08	3.12436e-06		1119327	2405650	679767	317498	1006693	906621		37.7393	81.1091	22.9191	10.7048	33.9417	30.5677	6	36.1636	9.80204					0.884424	1.38462	0.66182	0.266127	0.7925	1.18939	6	0.863147	0.161325		ratio =/total FA	1.52619	1.31906	1.44363	1.09591	1.69833	1.58104	6	1.44403	0.086985
C20	312	15749775	44.16	2.80385e-06			356681		237445		1321080		0	9.61615	0	6.40154	0	35.6164	6	8.60569	5.64988					0	0.164158	0	0.159146	0	1.38584	6	0.284857	0.222558
C20:1	310	8647057	22.08	2.55347e-06		238285	512301	384304	220971	247268	732616		5.88826	12.6595	9.49654	5.46041	6.11024	18.1037	6	9.61977	2.03939					0.137992	0.216111	0.274225	0.135749	0.142667	0.704414	6	0.268526	0.0900532
C20:2	308	7992227	22.08	2.76268e-06		740419	1515374	2030294	356093	1099826	1288104		19.9241	40.7776	54.6337	9.5822	29.5955	34.6619	6	31.5292	6.45304					0.466923	0.696118	1.57762	0.238219	0.691021	1.3487	6	0.836433	0.211897
C20:3	306	5382825	22.08	4.10194e-06		851517	901047	326348	214396	499260	629269		34.2438	36.2357	13.1241	8.62195	20.0778	25.3061	6	22.9349	4.54496					0.802506	0.618582	0.378976	0.214346	0.468793	0.98466	6	0.577977	0.115644
C20:4	304	6575146	22.08	3.3581e-06		22635817	17050440	19160414	18515437	31980061	16436059		750.132	565.037	634.96	613.586	1059.79	544.677	6	694.697	78.7046					17.5794	9.6458	18.3353	15.2541	24.7449	21.1934	6	17.7921	2.10598
C20:5	302	7499734	22.08	2.9441e-06		496561	686084	365676	278458	530405	732260		14.5225	20.0653	10.6946	8.1438	15.5123	21.4157	6	15.059	2.10422					0.340335	0.342536	0.308821	0.202459	0.362193	0.833286	6	0.398272	0.0900641
C21	326	7473153	22.08	2.95458e-06		710956	468040	2030294		460872	911039		19.3304	12.7257	55.2024	0	12.5308	24.7706	6	20.76	7.67605					0.45301	0.217242	1.59404	0	0.29258	0.963822	6	0.586783	0.240974
C22	340	13794713	44.16	3.20123e-06			255132				1071497		0	7.20649	0	0	0	30.2656	6	6.24535	4.94609					0	0.123023	0	0	0	1.17764	6	0.216776	0.193219
C22:1	338	7659733	22.08	2.88261e-06				365676			588920		0	0	9.35592	0	0	15.0677	6	4.0706	2.67799					0	0	0.270165	0	0	0.586283	6	0.142741	0.0990735
C23	354	6094896	22.08	3.6227e-06			221775	2144388			506675		0	6.80869	65.8346	0	0	15.5554	6	14.6998	10.5294					0	0.116232	1.90106	0	0	0.605259	6	0.437092	0.308091
C24	368	12447235	44.16	3.54778e-06						253356	1132062		0	0	0	0	7.32758	32.7416	6	6.6782	5.34826					0	0	0	0	0.171091	1.27398	6	0.240844	0.208507
											saturados		1473.74	2023.04	1296.86	2007.4	1434.58	962.416	6	1533.01	169.285					34.5373	34.5355	37.4485	49.905	33.4958	37.4476	6	37.8949	2.49369
											MUFA		703.037	1262.04	677.455	883.718	655.954	368.38	6	758.431	121.325					16.4757	21.5445	19.5624	21.9697	15.3158	14.3337	6	18.2003	1.33533
											PUFA		2090.33	2566.37	1488.73	1122.28	2192.33	1210.96	6	1778.5	239.857					48.987	43.8108	42.9891	27.9005	51.1885	47.1185	6	43.6657	3.39535
											omega-3		27.4304	38.1122	17.0871	8.1438	28.4608	42.9157	6	27.025	5.26918					0.642834	0.650616	0.493413	0.202459	0.664527	1.66985	6	0.720617	0.202916
											omega-6		2062.9	2528.26	1471.64	1114.13	2163.87	1168.05	6	1751.48	237.722					48.3442	43.1602	42.4957	27.698	50.5239	45.4487	6	42.9451	3.29433
											trans		0	6.40263	0	9.04219	0	28.276	6	7.2868	4.48591					0	0.1093	0	0.224794	0	1.10022	6	0.239052	0.176076
											total		4267.11	5857.86	3463.04	4022.44	4282.87	2570.03	6	4077.22	443.503					100	100	100	100	100	100	6	100	0
											n-6/n-3		75.2047	66.3373	86.1259	136.808	76.0299	27.2172	6	77.9538	14.4349
						Hembras control
PATRÓN	PM	Área	ppm	ppm/área		Área							concentración (µM)
						7	8	9	10	11	12		7	8	9	10	11	12	n	media	error					7	8	9	10	11	12	n	media	error			7	8	9	10	11	12	n	media	error
C14	228	16836610	44.16	2.62286e-06		1331747	1945268	1020988	2230396	885360	1830918		45.9603	67.1337	35.2356	76.9738	30.5549	63.1873	6	53.1742	7.63111		37.222	5.34178		0.710105	0.840333	0.809267	0.75317	0.468116	0.66884	6	0.708305	0.0544332
C15	242	8178707	22.08	2.69969e-06		460097	809422	299571	565868	368326	792906		15.3982	27.0891	10.0258	18.9381	12.3269	26.5364	6	18.3857	2.93264		12.87	2.05285		0.237908	0.339083	0.230266	0.185304	0.188854	0.280889	6	0.243718	0.0238839		= en mufa	1076.54	922.699	707.352	1236.11	657.714	1131.65	6	955.345	95.8739
C16	256	25940014	66.24	2.55358e-06		57998967	66333609	42616832	77182184	45882723	70805795		1735.61	1985.02	1275.3	2309.66	1373.03	2118.85	6	1799.58	169.057		1259.71	118.34		26.8158	24.8471	29.2903	22.5995	21.0355	22.4281	6	24.5027	1.26935		=en pufa	4270.06	6881.07	2229.44	8178.33	6402.16	8226.47	6	6031.25	963.402
C16:1	254	8522738	22.08	2.59072e-06		7215365	4051985	6095808	7182784	2295318	6749136		220.783	123.987	186.526	219.786	70.2345	206.517	6	171.306	24.9829		119.914	17.488		3.41119	1.55198	4.284	2.15056	1.07603	2.18599	6	2.44329	0.487879		=en pufa (n3)	81.2901	97.5673	23.5698	140.573	111.569	178.219	6	105.465	21.538
C17	270	8853268	22.08	2.49399e-06		543547	1069518	479253	876798	465482	891838		15.0623	29.6375	13.2806	24.297	12.899	24.7138	6	19.9817	2.90699		13.9872	2.0349		0.232718	0.370982	0.30502	0.23774	0.197619	0.261596	6	0.267613	0.0252519		=en pufa (N6)	4188.77	6783.5	2205.87	8037.76	6290.6	8048.25	6	5925.79	943.205
C18	284	17150681	44.16	2.57482e-06		28057452	38875490	27435388	71547673	39309668	51626993		763.131	1057.37	746.211	1946.01	1069.18	1404.2	6	1164.35	184.828		815.045	129.38		11.7907	13.2354	17.1385	19.0413	16.3803	14.8635	6	15.4083	1.08386		=en trans	6.89865	11.5701	4.57611	16.2851	0	7.69429	6	7.83738	2.29681
C18:1	282	17246446	44.16	2.56053e-06		47645616	42993773	30004081	55396940	31086715	50220572		1297.85	1171.14	817.301	1508.99	846.791	1367.99	6	1168.34	115.37		817.841	80.7591		20.0523	14.6595	18.7712	14.7651	12.9733	14.4802	6	15.9503	1.1384		=total	5353.5	7815.34	2941.36	9430.73	7059.88	9365.81	6	6994.44	1022.37
C18:1t	282	8647289	22.08	2.5534e-06			0	240662	245063				0	0	6.53731	6.65685	0	0	6	2.19903	1.39087		1.53932	0.97361		0	0	0.150144	0.0651358	0	0	6	0.03588	0.025207		% =en trans	0.128863	0.148044	0.155578	0.172681	0	0.082153	6	0.114553	0.0261792
C18:2	280	7871370	22.08	2.8051e-06		51630035	65733256	26946397	67225431	49046808	78911208		1551.72	1975.59	809.865	2020.44	1474.09	2371.65	6	1700.56	223.242		1190.39	156.269		23.9748	24.7291	18.6004	19.7695	22.5837	25.104	6	22.4603	1.1043		% =en PUFA	79.762	88.0457	75.796	86.72	90.6838	87.8351	6	84.8071	2.34169
C18:2t	280	8073975	22.08	2.73471e-06		168175	282056		283401		187571		4.92761	8.26438	0	8.30379	0	5.49592	6	4.49862	1.53095		3.14903	1.07166		0.0761336	0.103448	0	0.0812506	0	0.0581745	6	0.0531678	0.0178165		% =en PUFA (n3)	1.51845	1.24841	0.801323	1.49058	1.58033	1.90286	6	1.42366	0.15118
C18:3 n3	278	7409069	22.08	2.98013e-06		606411	743640	349000	569354	735673	851967		19.502	23.9152	11.2237	18.3102	23.659	27.399	6	20.6682	2.31596		14.4677	1.62117		0.301314	0.299355	0.257779	0.179162	0.362468	0.290019	6	0.281683	0.024749		% =en PUFA (n6)	78.2435	86.7973	74.9947	85.2294	89.1035	85.9322	6	83.3834	2.24401
C18:3 n6	278	7067056	22.08	3.12436e-06		1599649	1923640	430274	1507385	1128141	2312469		53.9339	64.8576	14.5071	50.8231	38.0365	77.9674	6	50.0209	8.98506		35.0147	6.28954		0.8333	0.811843	0.333191	0.497292	0.582738	0.825288	6	0.647275	0.0853787		ratio =/total FA	1.18162	1.39753	0.965075	1.31825	1.54515	1.41625	6	1.30398	0.0835767
C20	312	15749775	44.16	2.80385e-06		237139	191216		644622	200018			6.39329	5.1552	0	17.3791	5.3925	0	6	5.72001	2.59647		4.00401	1.81753		0.0987789	0.0645293	0	0.17005	0.0826158	0	6	0.069329	0.0263468
C20:1	310	8647057	22.08	2.55347e-06		372423	452662	270165	492847	287189	475092		9.20294	11.1857	6.67605	12.1787	7.09673	11.74	6	9.68003	0.977738		6.77602	0.684417		0.142189	0.140015	0.153331	0.119166	0.108725	0.124268	6	0.131283	0.00679751
C20:2	308	7992227	22.08	2.76268e-06		1198838	1296410	414155	1136486	2311413	1017995		32.2598	34.8854	11.1446	30.582	62.1984	27.3935	6	33.0773	6.76154		23.1541	4.73308		0.498428	0.436672	0.255962	0.299238	0.95291	0.289961	6	0.455528	0.106654
C20:3	306	5382825	22.08	4.10194e-06		788223	949477	549552	2172685	915440	1777412		31.6984	38.1833	22.1003	87.3746	36.8145	71.4787	6	47.9416	10.4237		33.5591	7.2966		0.489754	0.477952	0.507584	0.85494	0.564016	0.756605	6	0.608475	0.0648008
C20:4	304	6575146	22.08	3.3581e-06		19305614	40440400	10556968	52550222	42920868	47157781		639.772	1340.16	349.849	1741.47	1422.36	1562.77	6	1176.06	225.614		823.244	157.93		9.88473	16.7752	8.0351	17.0399	21.7913	16.542	6	15.0114	2.08556
C20:5	302	7499734	22.08	2.9441e-06		394055	462532		997653	604577	1178969		11.5246	13.5272	0	29.1774	17.6815	34.4802	6	17.7318	5.10601		12.4123	3.5742		0.178059	0.169325	0	0.285494	0.270889	0.364974	6	0.211457	0.0516997
C21	326	7473153	22.08	2.95458e-06					1272899	345602	534741		0	0	0	34.6093	9.39669	14.5393	6	9.75754	5.55648		6.83028	3.88954		0	0	0	0.338644	0.143962	0.153899	6	0.106084	0.0552469
C22	340	13794713	44.16	3.20123e-06		265864		653457	537341				7.50963	0	18.4576	15.1778	0	0	6	6.85751	3.3926		4.80026	2.37482		0.116027	0	0.423922	0.148511	0	0	6	0.114743	0.0673874
C22:1	338	7659733	22.08	2.88261e-06		394055	462532		973972	604577	1187932		10.082	11.834	0	24.9193	15.4683	30.3936	6	15.4495	4.44812		10.8147	3.11368		0.155771	0.14813	0	0.24383	0.236981	0.321717	6	0.184405	0.0452
C23	354	6094896	22.08	3.6227e-06				643926	277111				0	0	19.7691	8.50755	0	0	6	4.71277	3.31629		3.29894	2.32141		0	0	0.454043	0.0832444	0	0	6	0.089548	0.0741557
C24	368	12447235	44.16	3.54778e-06					324837				0	0	0	9.39496	0	0	6	1.56583	1.56583		1.09608	1.09608		0	0	0	0.0919275	0	0	6	0.0153213	0.0153213
											saturados		2589.06	3171.4	2118.28	4460.95	2512.78	3652.02	6	3084.08	352.617		2158.86	246.832		40.0021	39.6975	48.6513	43.6494	38.497	38.6568	6	41.5257	1.61608
											MUFA		1537.92	1318.14	1010.5	1765.88	939.591	1616.64	6	1364.78	136.963		955.345	95.8739		23.7615	16.4996	23.2085	17.2787	14.395	17.1122	6	18.7093	1.56909
											PUFA		2340.41	3491.12	1218.69	3978.18	3074.84	4173.14	6	3046.06	453.698		2132.24	317.589		36.1603	43.6995	27.9901	38.9255	47.108	44.1728	6	39.676	2.83507
											omega-3		31.0266	37.4425	11.2237	47.4877	41.3405	61.8792	6	38.4	6.91939		26.88	4.84357		0.479373	0.468679	0.257779	0.464656	0.633357	0.654994	6	0.49314	0.0585524
											omega-6		2309.39	3453.68	1207.47	3930.69	3033.5	4111.26	6	3007.66	447.131		2105.36	312.992		35.681	43.2308	27.7323	38.4609	46.4746	43.5178	6	39.1829	2.78237
											trans		4.92761	8.26438	6.53731	14.9606	0	5.49592	6	6.69764	2.00161		4.68835	1.40113		0.0761336	0.103448	0.150144	0.146386	0	0.0581745	6	0.0890478	0.0232933
											total		6472.32	7988.93	4354.01	10220	6527.21	9447.3	6	7501.62	881.834		5251.14	617.284		100	100	100	100	100	100	6	100	0
											n-6/n-3		74.4326	92.2396		82.7728	73.3783	66.4401	5	77.8527	4.43371
						Machos cafeteria
PATRÓN	PM	Área	ppm	ppm/área		Área							concentración (µM)
						13	14	15	16	17	18		13	14	15	16	17	18	n	media	error					13	14	15	16	17	18	n	media	error			13	14	15	16	17	18	n	media	error
C14	228	16836610	44.16	2.62286e-06		5867761	924755	3988624	1247927	374685			202.504	31.9145	137.652	43.0675	12.9309		5	85.6138	36.2959					1.07842	0.416315	0.871503	0.762571	1.03603		5	0.832967	0.118643
C15	242	8178707	22.08	2.69969e-06		2275919	596955	1321453	573542	151050			76.1688	19.9785	44.2254	19.1949	5.05523		5	32.9246	12.5112					0.405633	0.260613	0.279999	0.339872	0.405027		5	0.338229	0.0303504		= en mufa	5173.39	1508.72	3846.21	1295.97	235.979		5	2412.05	907.71
C16	256	25940014	66.24	2.55358e-06		98312094	54793984	125780850	44558379	11282420			2941.97	1639.7	3763.97	1333.4	337.624		5	2003.33	605.661					15.6673	21.3894	23.8304	23.6097	27.0506		5	22.3095	1.89007		=en pufa	21406	9698.04	16584	6913.07	1451.74		5	11210.6	3527.13
C16:1	254	8522738	22.08	2.59072e-06		13985403	1837894	10075221	4055063	629785			427.94	56.2377	308.292	124.081	19.2708		5	187.164	78.0878					2.27897	0.733605	1.95185	2.19703	1.54398		5	1.74109	0.282444		=en pufa (n3)	363.131	113.121	221.23	125.985	0		5	164.693	60.7684
C17	270	8853268	22.08	2.49399e-06		18977228	603237	1454365	561495	118958			525.879	16.7163	40.302	15.5596	3.29645		5	120.351	101.559					2.80054	0.21806	0.255159	0.275505	0.264113		5	0.762675	0.509557		=en pufa (N6)	21042.9	9584.92	16362.8	6787.09	1451.74		5	11045.9	3467.92
C18	284	17150681	44.16	2.57482e-06		52056296	27389080	58563762	18826172	5415902			1415.87	744.952	1592.87	512.05	147.306		5	882.609	272.559					7.54015	9.71767	10.0847	9.06657	11.8022		5	9.64227	0.693444		=en trans	36.3031	0	15.9822	0	0		5	10.4571	7.16448
C18:1	282	17246446	44.16	2.56053e-06		169503012	52233428	126552592	42054330	7955623			4617.2	1422.82	3447.25	1145.55	216.708		5	2169.91	807.567					24.5887	18.5603	21.8252	20.2835	17.3628		5	20.5241	1.26732		=total	26615.7	11206.8	20446.2	8209.04	1687.72		5	13633.1	4432.65
C18:1t	282	8647289	22.08	2.5534e-06				145936					0	0	3.96418	0	0		5	0.792837	0.792837					0	0	0.025098	0	0		5	0.00501959	0.00501959		% =en trans	0.136397	0	0.0781673	0	0		5	0.0429129	0.0278448
C18:2	280	7871370	22.08	2.8051e-06		187117763	72098315	120431260	42046665	9269308			5623.76	2166.89	3619.52	1263.7	278.586		5	2590.49	936.599					29.9491	28.2665	22.9159	22.3756	22.3204		5	25.1655	1.63459		% =en PUFA	80.4263	86.5374	81.1105	84.2129	86.0179		5	83.661	1.24704
C18:2t	280	8073975	22.08	2.73471e-06		619496		205083					18.1515	0	6.00903	0	0		5	4.83211	3.52732					0.0966651	0	0.0380443	0	0		5	0.0269419	0.0189238		% =en PUFA (n3)	1.36435	1.0094	1.08201	1.53471	0		5	0.998094	0.26697
C18:3 n3	278	7409069	22.08	2.98013e-06		935524	317187	430189	312593				30.0862	10.2006	13.8347	10.0529	0		5	12.8349	4.88886					0.160222	0.133064	0.0875903	0.178001	0		5	0.111776	0.0318314		% =en PUFA (n6)	79.0619	85.528	80.0285	82.6782	86.0179		5	82.6629	1.40307
C18:3 n6	278	7067056	22.08	3.12436e-06		7568121		3548166	1265552	200487			255.167	0	119.63	42.6694	6.75963		5	84.8453	47.5891					1.35888	0	0.757401	0.755523	0.541585		5	0.682678	0.218414		ratio =/total FA	1.41741	1.46189	1.29449	1.45353	1.35221		5	1.3959	0.0318838
C20	312	15749775	44.16	2.80385e-06		1742484	439050	735424	250295				46.9775	11.8368	19.8271	6.74798	0		5	17.0779	8.14671					0.250176	0.154408	0.125529	0.119482	0		5	0.129919	0.0400429
C20:1	310	8647057	22.08	2.55347e-06		3257969	615939	2392220	370826				80.5077	15.2205	59.1141	9.16348	0		5	32.8012	15.6717					0.428739	0.198547	0.374263	0.162252	0		5	0.23276	0.0770552
C20:2	308	7992227	22.08	2.76268e-06		2629691	4172394	1322530	720129				70.763	112.276	35.5883	19.3781	0		5	47.6011	19.9073					0.376845	1.46461	0.225316	0.343117	0		5	0.481977	0.254369
C20:3	306	5382825	22.08	4.10194e-06		4419767	1521450	2070608	993995	200081			177.741	61.1852	83.2696	39.9736	8.04627		5	74.0432	28.7403					0.946551	0.798143	0.527195	0.707788	0.64467		5	0.72487	0.0708204
C20:4	304	6575146	22.08	3.3581e-06		63030698	36535531	63700007	29972127	6413480			2088.78	1210.76	2110.96	993.251	212.537		5	1323.26	357.895					11.1237	15.794	13.3649	17.5869	17.0286		5	14.9796	1.20695
C20:5	302	7499734	22.08	2.9441e-06		1866049	564311	1229058	655309				54.5746	16.5039	35.9451	19.1652	0		5	25.2378	9.28816					0.290634	0.215288	0.227575	0.339347	0		5	0.214569	0.0581227
C21	326	7473153	22.08	2.95458e-06		2025395	4204516	11288172	996707				55.0692	114.318	306.918	27.0998	0		5	100.681	54.9322					0.293268	1.49125	1.94315	0.47984	0		5	0.841502	0.372511
C22	340	13794713	44.16	3.20123e-06		739934		355582	226410				20.9003	0	10.0438	6.3952	0		5	7.46785	3.87139					0.111303	0	0.0635892	0.113236	0		5	0.0576257	0.0251503
C22:1	338	7659733	22.08	2.88261e-06		1866049	564311	1233212	671425				47.7434	14.438	31.5521	17.1786	0		5	22.1824	8.11858					0.254255	0.18834	0.199762	0.304171	0		5	0.189306	0.0516524
C23	354	6094896	22.08	3.6227e-06				133418					0	0	4.09605	0	0		5	0.81921	0.81921					0	0	0.0259328	0	0		5	0.00518657	0.00518657
C24	368	12447235	44.16	3.54778e-06									0	0	0	0	0		5	0	0					0	0	0	0	0		5	0	0
											saturados		5285.34	2579.42	5919.9	1963.52	506.213		5	3250.88	1022.35					28.1468	33.6477	37.48	34.7668	40.558		5	34.9199	2.07194
											MUFA		5173.39	1508.72	3846.21	1295.97	235.979		5	2412.05	907.71					27.5506	19.6808	24.351	22.9469	18.9068		5	22.6872	1.57828
											PUFA		8300.88	3577.81	6018.75	2388.19	505.929		5	4158.31	1368.07					44.2059	46.6715	38.1058	42.2862	40.5352		5	42.3609	1.47359
											omega-3		84.6608	26.7045	49.7799	29.2181	0		5	38.0727	14.0796					0.450856	0.348353	0.315165	0.517348	0		5	0.326344	0.0891895
											omega-6		8216.22	3551.11	5968.97	2358.97	505.929		5	4120.24	1354.33					43.755	46.3232	37.7907	41.7689	40.5352		5	42.0346	1.44363
											trans		18.1515	0	9.97322	0	0		5	5.62495	3.67929					0.0966651	0	0.0631423	0	0		5	0.0319615	0.0202773
											total		18777.8	7665.95	15794.8	5647.67	1248.12		5	9826.87	3251.66					100	100	100	100	100		5	100	0
											n-6/n-3		97.0487	132.978	119.907	80.7366			4	107.668	11.6493
						Hembras cafeteria
PATRÓN	PM	Área	ppm	ppm/área		Área							concentración (µM)
						19	20	21	22	23	24		19	20	21	22	23	24	n	media	error					19	20	21	22	23	24	n	media	error
C14	228	16836610	44.16	2.62286e-06		1048450			1984431	2352127	1003286		36.1833			68.4852	81.1749	34.6247	4	55.117	11.6767					0.747949			0.595871	0.463396	1.17186	4	0.744769	0.153774			19	20	21	22	23	24	n	media	error
C15	242	8178707	22.08	2.69969e-06		343179			895661	1008424	262595		11.4853			29.9753	33.7492	8.78834	4	20.9995	6.34267					0.237413			0.260807	0.192661	0.297438	4	0.24708	0.0219454		= en mufa	1117.44			1762.25	4628.81	710.062	4	2054.64	884.971
C16	256	25940014	66.24	2.55358e-06		43904863			80215648	138319752	37371982		1313.84			2400.44	4139.19	1118.35	4	2242.96	692.128					27.1586			20.8856	23.6291	37.8501	4	27.3808	3.71842		=en pufa	4686.94			16335.2	18111.8	2078.75	4	10303.2	4047.05
C16:1	254	8522738	22.08	2.59072e-06		2524009			1101788	7937632	1547464		77.2322			33.7136	242.884	47.3509	4	100.295	48.3904					1.59647			0.293333	1.38653	1.60257	4	1.21973	0.312855		=en pufa (n3)	66.2253			232.521	206.449	0	4	126.299	55.7281
C17	270	8853268	22.08	2.49399e-06		427210			1112479	1288669	180392		11.8384			30.828	35.7104	4.99885	4	20.8439	7.37596					0.244713			0.268226	0.203857	0.169184	4	0.221495	0.0219286		=en pufa (N6)	4620.72			16102.7	17905.4	2078.75	4	10176.9	3992.65
C18	284	17150681	44.16	2.57482e-06		19637838			80398740	76273325	13064186		534.127			2186.75	2074.55	355.331	4	1287.69	488.587					11.041			19.0264	11.8428	12.026	4	13.484	1.85978		=en trans	0			60.3133	0	56.1479	4	29.1153	16.8312
C18:1	282	17246446	44.16	2.56053e-06		37991299			62026605	159166708	24328915		1034.87			1689.58	4335.65	662.711	4	1930.7	829.267					21.3919			14.7006	24.7505	22.4292	4	20.8181	2.15663		=total	5804.39			18157.8	22740.6	2844.96	4	12386.9	4786.1
C18:1t	282	8647289	22.08	2.5534e-06									0			0	0	0	4	0	0					0			0	0	0	4	0	0		% =en trans	0			0.332162	0	1.97359	4	0.576438	0.472252
C18:2	280	7871370	22.08	2.8051e-06		40099985			55426629	120296343	11366231		1205.19			1665.83	3615.47	341.608	4	1707.02	692.823					24.9126			14.4939	20.6393	11.5616	4	17.9019	3.00635		% =en PUFA	80.7483			89.9626	79.6452	73.0679	4	80.856	3.47687
C18:2t	280	8073975	22.08	2.73471e-06		3555063			1029220		958139					30.1567	0	28.0739	3	19.4102	9.7237					0			0.262385	0	0.950152	4	0.303134	0.224364		% =en PUFA (n3)	1.14095			1.28056	0.907843	0	4	0.832339	0.287899
C18:3 n3	278	7409069	22.08	2.98013e-06		384830			1135649	445446			12.376			36.5221	14.3254	0	4	15.8059	7.59904					0.255826			0.317769	0.0817783	0	4	0.163843	0.0740119		% =en PUFA (n6)	79.6073			88.6821	78.7374	73.0679	4	80.0237	3.2298
C18:3 n6	278	7067056	22.08	3.12436e-06		1287450			866723	3589344	223133		43.4078			29.2225	121.019	7.52317	4	50.293	24.7028					0.897285			0.254257	0.690849	0.254619	4	0.524253	0.161376		ratio =/total FA	1.19983			1.57986	1.29818	0.962867	4	1.26018	0.127696
C20	312	15749775	44.16	2.80385e-06		178902			603628	1222570			4.82321			16.2739	32.9606	0	4	13.5144	7.32544					0.0997011			0.141595	0.188159	0	4	0.107364	0.0400888
C20:1	310	8647057	22.08	2.55347e-06					698962	835617			0			17.272	20.6489	0	4	9.48025	5.51666					0			0.150279	0.117877	0	4	0.0670391	0.0392661
C20:2	308	7992227	22.08	2.76268e-06		410331			730533	1289939			11.0417			19.6581	34.7113	0	4	16.3528	7.32337					0.228244			0.17104	0.198154	0	4	0.149359	0.0511386
C20:3	306	5382825	22.08	4.10194e-06		448291			1294963	3246114	206681		18.028			52.077	130.543	8.31169	4	52.2398	27.7361					0.372659			0.453108	0.745218	0.281306	4	0.463073	0.100382
C20:4	304	6575146	22.08	3.3581e-06		15117645			94207479	74310406	10169496		500.986			3121.96	2462.58	337.008	4	1605.63	699.002					10.3559			27.1633	14.0579	11.4059	4	15.7458	3.88473
C20:5	302	7499734	22.08	2.9441e-06		198982			840829	1117915			5.81944			24.5909	32.6946	0	4	15.7763	7.70259					0.120294			0.213959	0.186641	0	4	0.130224	0.0476545
C21	326	7473153	22.08	2.95458e-06		407512			275949	903248			11.08			7.50287	24.5587	0	4	10.7854	5.13883					0.229035			0.0652805	0.140196	0	4	0.108628	0.0493065
C22	340	13794713	44.16	3.20123e-06					381306				0			10.7704	0	0	4	2.6926	2.6926					0			0.0937105	0	0	4	0.0234276	0.0234276
C22:1	338	7659733	22.08	2.88261e-06		208760			847333	1158157			5.34118			21.6792	29.6318	0	4	14.163	6.91732					0.110408			0.188625	0.169156	0	4	0.117047	0.0424096
C23	354	6094896	22.08	3.6227e-06						1802188			0			0	55.3287	0	4	13.8322	13.8322					0			0	0.315851	0	4	0.0789627	0.0789627
C24	368	12447235	44.16	3.54778e-06									0			0	0	0	4	0	0					0			0	0	0	4	0	0
											saturados		1923.38			4751.03	6477.22	1522.09	4	3668.43	1180.16					39.7584			41.3374	36.976	51.5146	4	42.3966	3.17022
											MUFA		1117.44			1762.25	4628.81	710.062	4	2054.64	884.971					23.0988			15.3328	26.4241	24.0318	4	22.2219	2.40073
											PUFA		1796.85			4949.86	6411.34	694.452	4	3463.13	1333.68					37.1429			43.0674	36.5999	23.5034	4	35.0784	4.12694
											omega-3		18.1955			61.1131	47.02	0	4	31.5821	13.8053					0.37612			0.531728	0.268419	0	4	0.294067	0.111933
											omega-6		1778.66			4888.74	6364.32	694.452	4	3431.54	1321.25					36.7667			42.5356	36.3315	23.5034	4	34.7843	4.0173
											trans		0			30.1567	0	28.0739	4	14.5576	8.41561					0			0.262385	0	0.950152	4	0.303134	0.224364
											total		4837.68			11493.3	17517.4	2954.68	4	9200.75	3322.55					100			100	100	100	4	100	0
						3.90975
											n-6/n-3		97.7527			79.995	135.353		3	104.367	16.3192
